# Supplementary material for: Transcriptome analysis revealed that a quorum sensing system regulates the transfer of the pAt megaplasmid in Agrobacterium tumefaciens
Source: PubMed Central journal article supplement (PMC4992315; doi:10.1186/s12864-016-3007-5), 2016-08-20

**Additional file 3.**

**Mutagenesis of the quorum sensing determinants of pAtP4.**

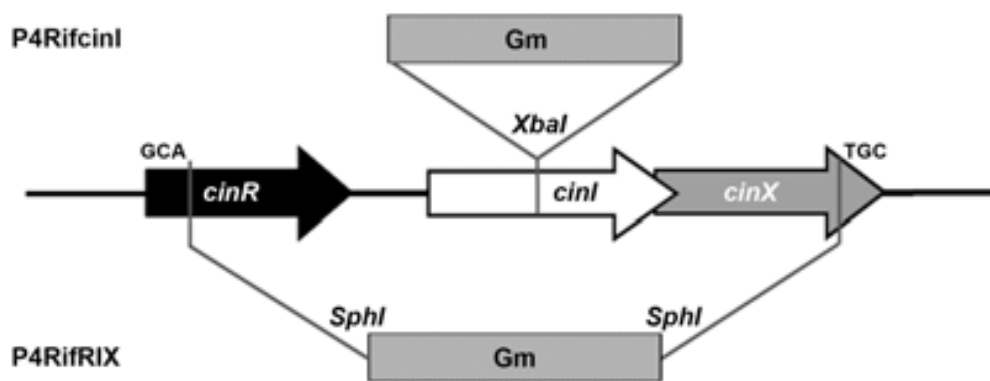

Supplement: 12864_2016_3007_MOESM3_ESM.pdf [file 12864_2016_3007_MOESM3_ESM.pdf]
