# Supplementary material for: Transcriptome analysis revealed that a quorum sensing system regulates the transfer of the pAt megaplasmid in Agrobacterium tumefaciens
Source: PubMed Central journal article supplement (PMC4992315; doi:10.1186/s12864-016-3007-5), 2016-08-20
Supplement: 12864_2016_3007_MOESM4_ESM.pdf [file 12864_2016_3007_MOESM4_ESM.pdf]

**Additional file 4.**

**The 32 differentially expressed genes identified by RNA-seq.**

| <b>Gene name</b>           | <b>Fold change <sup>a</sup></b> | <b>P-value</b> | <b>RT-qPCR<br/>Fold change <sup>a</sup></b> | <b>Closest ortholog<br/>Percentage of identity and organism <sup>b</sup></b>         |
|----------------------------|---------------------------------|----------------|---------------------------------------------|--------------------------------------------------------------------------------------|
| <i>avhB1</i>               | 533                             | 2.15 E-116     |                                             | AGT5Av1_80235 ( <i>avhB1</i> )<br>Id= 99.71 % <i>A. tumefaciens</i> 5A               |
| AGROTU_05881               | 453                             | 4.36 E-114     |                                             | between positions 4199088 and 4199627<br>Id= 99.81% <i>A. tumefaciens</i> 5A         |
| <i>avhB4</i>               | 4521                            | 2.58 E-112     |                                             | AGT5Av1_80232 ( <i>avhB4</i> ) Id= 99.66 %<br>Id= 99.66 % <i>A. tumefaciens</i> 5A   |
| <i>avhB5</i> <sup>c</sup>  | 347                             | 3.45 E-103     | 23 698                                      | AGT5Av1_80231 ( <i>avhB5</i> )<br>Id= 99.43 % <i>A. tumefaciens</i> 5A               |
| <i>avhB7</i>               | 287                             | 1.19 E-99      |                                             | AGT5Av1_80228 ( <i>avhB7</i> ) Id= 100 %<br><i>A. tumefaciens</i> 5A                 |
| <i>avhB2</i>               | 257                             | 1.83 E-95      |                                             | AGT5Av1_80234 ( <i>avhB2</i> ), Id= 99.67 %<br>Id= 100 % <i>A. tumefaciens</i> 5A    |
| <i>avhB6</i>               | 248                             | 1.71 E-91      |                                             | AGT5Av1_80229 ( <i>avhB6</i> ) Id= 99.89 %<br>Id= 99.89 % <i>A. tumefaciens</i> 5A   |
| <i>avhB9</i>               | 206                             | 1.97 E-89      |                                             | AGT5Av1_80226 ( <i>avhB9</i> ) Id= 99.06 %<br>Id= 99.06 % <i>A. tumefaciens</i> 5A   |
| AGROTU_05875               | 195                             | 1.78 E-88      |                                             | AGRT5Av1_80230<br>Id= 99.57 % <i>A. tumefaciens</i> 5A                               |
| <i>avhB10</i>              | 167                             | 1.08 E-85      |                                             | AGT5Av1_80225 ( <i>avhB10</i> )<br>Id= 98.72 % <i>A. tumefaciens</i> 5A              |
| <i>avhB8</i>               | 125                             | 3.91 E-82      |                                             | AGT5Av1_80227 ( <i>avhB8</i> )<br>Id= 99.85 % <i>A. tumefaciens</i> 5A               |
| AGROTU_05943               | 122                             | 5.81 E-69      |                                             | between positions 4835062 and 4835412<br>Id= 97.44 % <i>A. radiobacter</i> DSM 30147 |
| <i>traC</i>                | 81                              | 1.16 E-66      |                                             | AGT5Av1_80303 ( <i>traC</i> )<br>Id= 97.57 % <i>A. tumefaciens</i> 5A                |
| <i>traD</i>                | 75                              | 4.38 E-59      |                                             | AGT5Av1_80304 ( <i>traD</i> )<br>Id= 99.15 % <i>A. tumefaciens</i> 5A                |
| <i>avhB11</i> <sup>c</sup> | 65                              | 5.09 E-58      | 2 237                                       | AGT5Av1_80224 ( <i>avhB11</i> )<br>Id= 97.82 % <i>A. tumefaciens</i> 5A              |
| <i>cinI</i> <sup>c</sup>   | 61                              | 1.50 E-43      | 61 892                                      | AGT5Av1_80284 ( <i>cinI</i> )<br>Id= 95.91 % <i>A. tumefaciens</i> 5A                |
| <i>avhB3</i>               | 46                              | 1.46 E-34      |                                             | AGT5Av1_80233 ( <i>avhB3</i> )<br>Id= 99.71 % <i>A. tumefaciens</i> 5A               |
| <i>traG</i> <sup>c</sup>   | 35                              | 1.31 E-32      | 3 839                                       | Atu5108 ( <i>traG</i> )<br>Id= 96.67 % <i>A. tumefaciens</i> C58                     |
| AGROTU_05944               | 28                              | 9.01 E-30      |                                             | between positions 4835488 and 4835622<br>Id= 100 % <i>A. radiobacter</i> DSM 30147   |
| <i>cinX</i> <sup>c</sup>   | 22                              | 4.14 E-25      | 143                                         | between positions 4818616 and 4819344<br>Id= 95.20 % <i>A. radiobacter</i> DSM 30147 |

|                           |    |           |     |                                                                                        |
|---------------------------|----|-----------|-----|----------------------------------------------------------------------------------------|
| <i>sus</i>                | 18 | 1.08 E-23 |     | ASXYv1_3260077<br>Id= 98.00 % <i>A. radiobacter</i> DSM 30147                          |
| AGROTU_05920 <sup>c</sup> | 13 | 2.94 E-19 | 91  | between positions 4814075 and 4815474<br>Id= 97.00 % <i>A. radiobacter</i> DSM 30147   |
| <i>atsE</i>               | 9  | 7.19 E-15 |     | ASXYv1_3260045<br>Id= 98.27 % <i>A. radiobacter</i> DSM 30147                          |
| <i>msi287</i>             | 9  | 5.34 E-12 |     | AGT5Av1_80281<br>Id= 98.09 % <i>A. tumefaciens</i> 5A                                  |
| AGROTU_05953              | 7  | 2.19 E-09 |     | between positions 4845296 and 4845484<br>Id= 98.41 % <i>A. radiobacter</i> DSM 30147   |
| <i>traA</i> <sup>c</sup>  | 6  | 2.12 E-08 | 195 | AGT5Av1_80302 ( <i>traA</i> )<br>Id= 97.99 % <i>A. tumefaciens</i> 5A                  |
| <i>riorf105</i>           | 5  | 6.30 E-08 |     | ASXYv1_3260113,<br>Id= 99.71 % <i>A. radiobacter</i> DSM 30147                         |
| AGROTU_05378              | 5  | 2.33 E-07 |     | ATU1Lv1_20006<br>Id= 100 % <i>Agrobacterium</i> G1 <i>foundi</i>                       |
| <i>cinR</i> <sup>c</sup>  | 4  | 7.87 E-07 | 82  | ASXYv1_3260081,<br>Id= 98.47 % <i>A. radiobacter</i> DSM 30147                         |
| <i>msi250</i>             | 3  | 2.08 E-05 |     | ASXYv1_3260078<br>Id= 97.61 % <i>A. radiobacter</i> DSM 30147                          |
| AGROTU_03028              | 3  | 2.39 E-05 |     | AGRT5Av1_30210<br>Id= 98.46 % <i>A. tumefaciens</i> 5A                                 |
| AGROTU_05377              | 3  | 7.71 E-04 |     | between positions 86915 and 87076<br>Id= 97.53 % <i>Agrobacterium</i> G1 <i>foundi</i> |

a Fold change values have been rounded to the closest whole value and only fold change >3 have been retained in this work

b The identification of the closest ortholog was done by a blastN analysis. The associated information (gene accession, name, and origin) were extracted from MicroScope platform dedicated for *Agrobacterium* at

(<https://www.genoscope.cns.fr/agc/microscope/home/index.php>)

c The differential expression of these genes has been verified by RT-qPCR using the *At* plasmid *bIcR* gene transcript as a reference
